# Supplementary material for: Engineered red blood cells as an off-the-shelf allogeneic anti-tumor therapeutic
Source: PubMed Central journal article supplement (PMC8113241; doi:10.1038/s41467-021-22898-3), 2021-05-11
Supplement: 41467_2021_22898_MOESM1_ESM.pdf [file 41467_2021_22898_MOESM1_ESM.pdf]

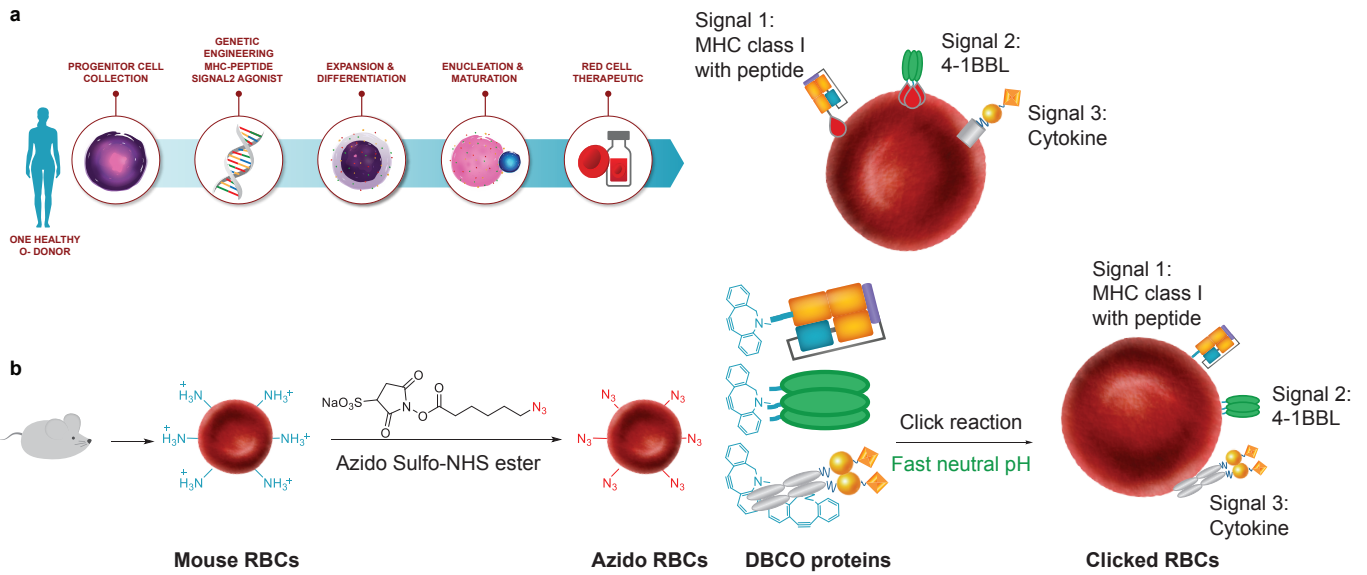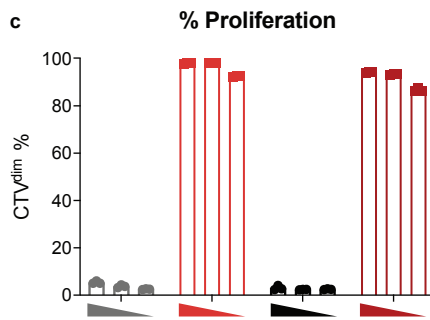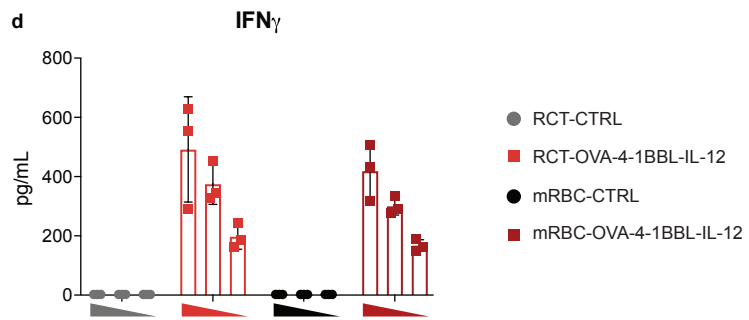

**Supplementary Fig. 1 RCT-aAPCs and murine surrogate mRBC-aAPCs.** **a**, Generation of RCT-aAPCs that express peptide-MHC class I complex fused to an antigenic peptide as signal 1, 4-1BBL as signal 2, and a cytokine as signal 3. **b**, Generation of mRBC-aAPCs using a click chemistry reaction to conjugate on the surface of mRBC peptide-MHC class I complex as signal 1, 4-1BBL as signal 2, and a cytokine as signal 3. **c-d**, CellTrace Violet dye-labeled OT-1 cells ( $1 \times 10^5$  per well,  $n=3$ ) were co-cultured with RCT-OVA-4-1BBL-IL-12, RCT-CTRL, mRBC-CTRL, or mRBC-OVA-4-1BBL-IL-12 at a 1:9, 1:3 or 1:1 ratio. % proliferation in OT-1 cells (**c**), and IFN $\gamma$  concentration in supernatant (**d**) on day 4. Data are depicted as mean  $\pm$  s.d and are representative of two independent experiments. Source data are provided as a Source Data file.

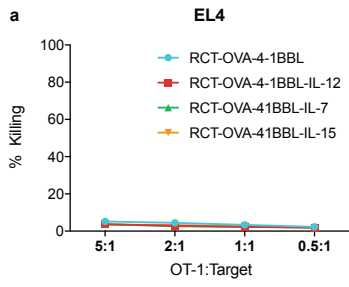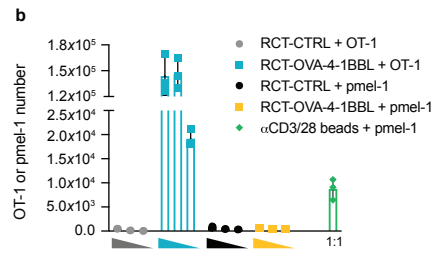

**Supplementary Fig. 2 Antigen-specificity of RCT-aAPCs.** **a**, EL4 percent killing by RCT-activated OT-1 CD8<sup>+</sup> T cells (n=3). **b**, OT-1 or pmel-1 numbers after 3 days co-incubation with a dose titration ( $1 \times 10^6$ ,  $3 \times 10^5$ , or  $1 \times 10^5$ ) of either RCT-CTRL or RCT-OVA-4-1BBL (n=3) with  $1 \times 10^5$  T cells, or  $1 \times 10^5$  anti-CD3/CD28 beads with  $1 \times 10^5$  T cells. Data are depicted as mean  $\pm$  s.d and are representative of two (**a**) or one (**b**) independent experiments. Source data are provided as a Source Data file.

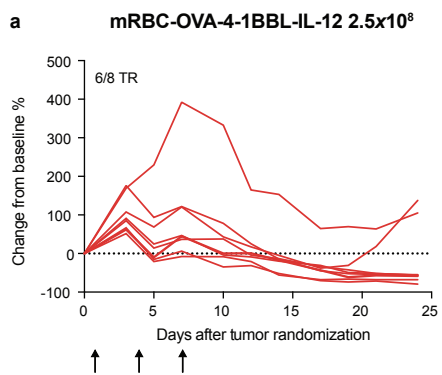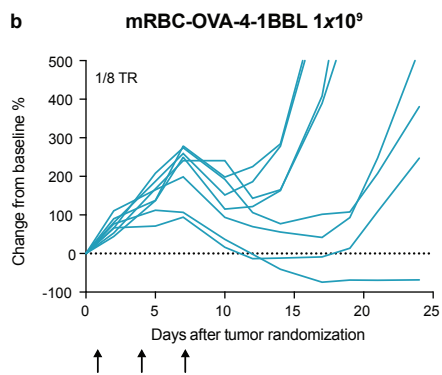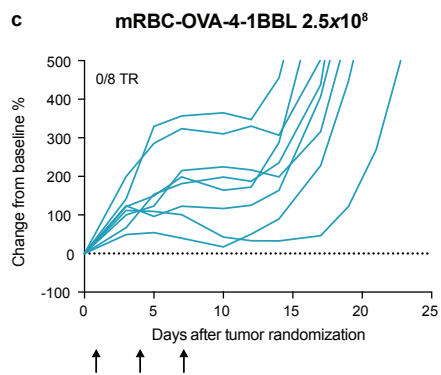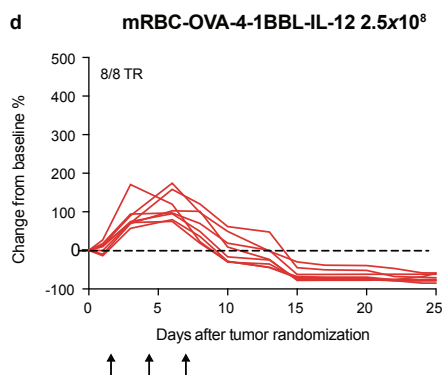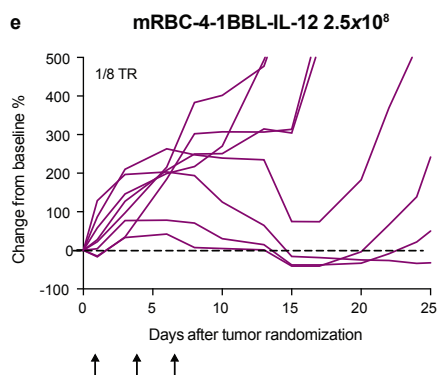

**Supplementary Fig. 3 mRBC-OVA-4-1BBL-IL-12 promotes tumor regressions in EG7.OVA tumor-bearing mice.** CD45.1 Pep Boy mice were injected subcutaneously with  $2 \times 10^6$  EG7.OVA cells. When the tumors reached a volume of  $\sim 150 \text{ mm}^3$ , the animals were randomized ( $n=8$ ) and dosed on day 1 post randomization with  $1 \times 10^6$  naïve OT-1 cells. The animals were then dosed on days 1, 4 and 7 with mRBC. **a–c**, Tumor regression (TR, reduction of tumor volume on day 24 compared to tumor volume at randomization) in  $2.5 \times 10^8$  mRBC-OVA-4-1BBL-IL-12 (**a**),  $1 \times 10^9$  mRBC-OVA-4-1BBL (**b**), or  $2.5 \times 10^8$  mRBC-OVA-4-1BBL (**c**) treated mice. In a separate study, CD45.1 Pep Boy mice were injected subcutaneously with  $2 \times 10^6$  EG7.OVA cells. When the tumors reached a volume of  $\sim 230 \text{ mm}^3$ , the animals were randomized ( $n=8$ ) and dosed on day 1 post-randomization with  $1 \times 10^6$  naïve OT-1 cells. The animals were then dosed on days 1, 4 and 7 with mRBC. **d–e**, TR of  $2.5 \times 10^8$  mRBC-OVA-4-1BBL-IL-12 (**d**) or  $2.5 \times 10^8$  mRBC-4-1BBL-IL-12 (**e**) treated mice. Results are representative of five (**a,d**), three (**b**), or two (**c, e**) independent experiments. Source data are provided as a Source Data file.

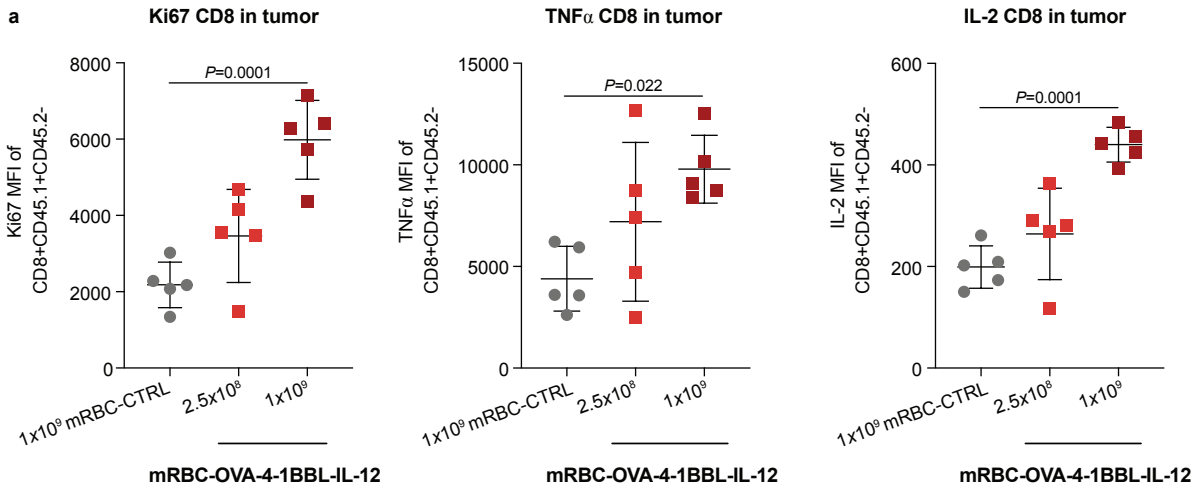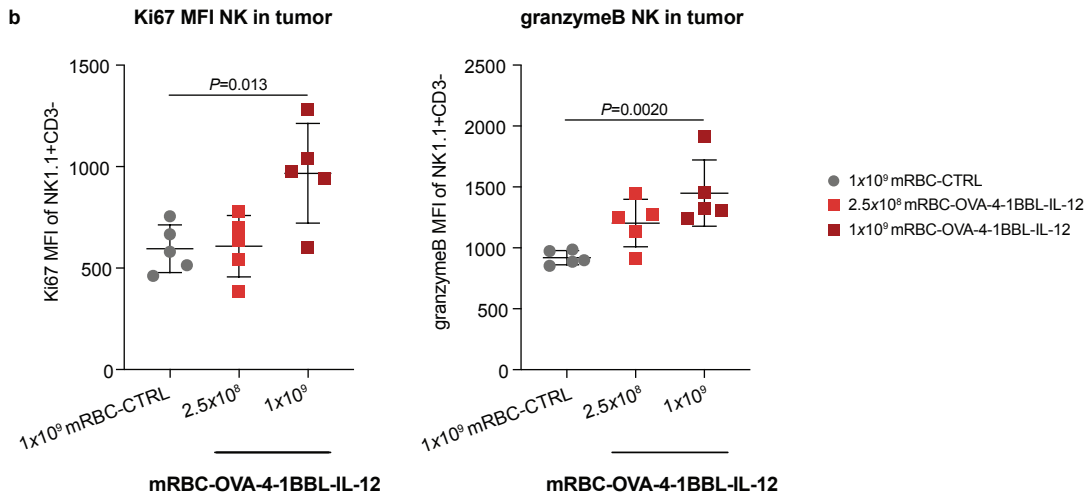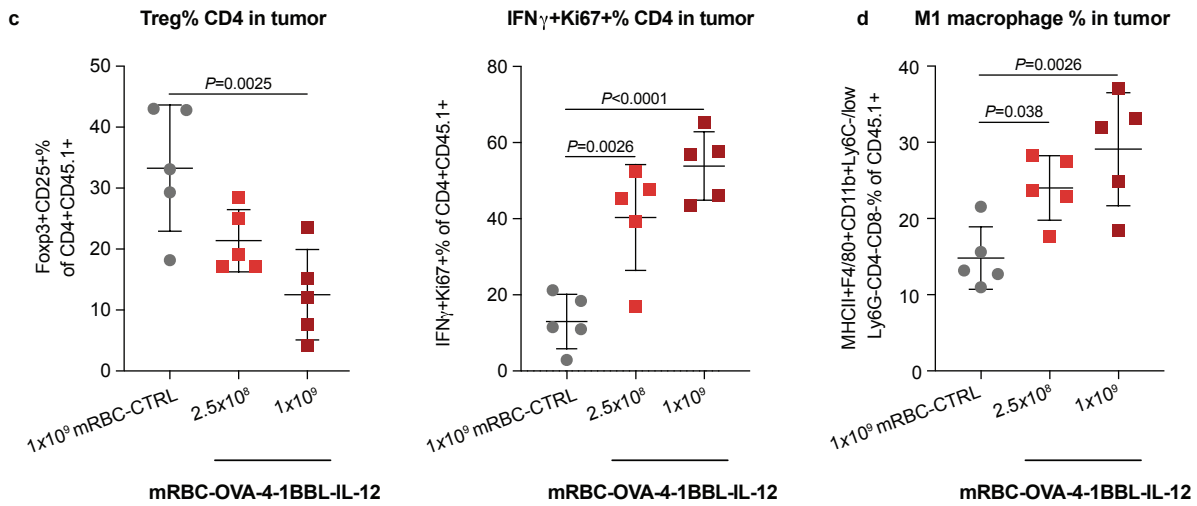

**Supplementary Fig. 4 mRBC-OVA-4-1BBL-IL-12 promoted general anti-tumor immune effects.**

CD45.1 Pep Boy mice were inoculated subcutaneously with  $2 \times 10^6$  EG7.OVA cells. When the tumors reached a volume of  $\sim 175 \text{ mm}^3$ , the animals were randomized ( $n=5$ ) and treated with  $1 \times 10^6$  naïve OT-1 cells. After,  $1 \times 10^9$  mRBC-CTRL or a dose titration of mRBC-OVA-4-1BBL-IL-12 ( $1 \times 10^9$ ,  $2.5 \times 10^8$ ) was administered on days 0 and 3. Mice were sacrificed on day 7. **a**, Ki67, TNF $\alpha$ , and IL-2 per cell expression in tumor infiltrating endogenous CD8<sup>+</sup> T cells; **b**, Ki67, and granzyme B per cell expression in tumor-infiltrating NK cells; **c**, Treg% and IFN $\gamma$ +Ki67+% in tumor infiltrating CD4<sup>+</sup> T cells; and **d**, M1 macrophage % in tumor infiltrating leukocytes. Data are depicted as mean  $\pm$  s.d. and are representative of two independent experiments. One-way ANOVA compared to mRBC-CTRL. Source data are provided as a Source Data file.



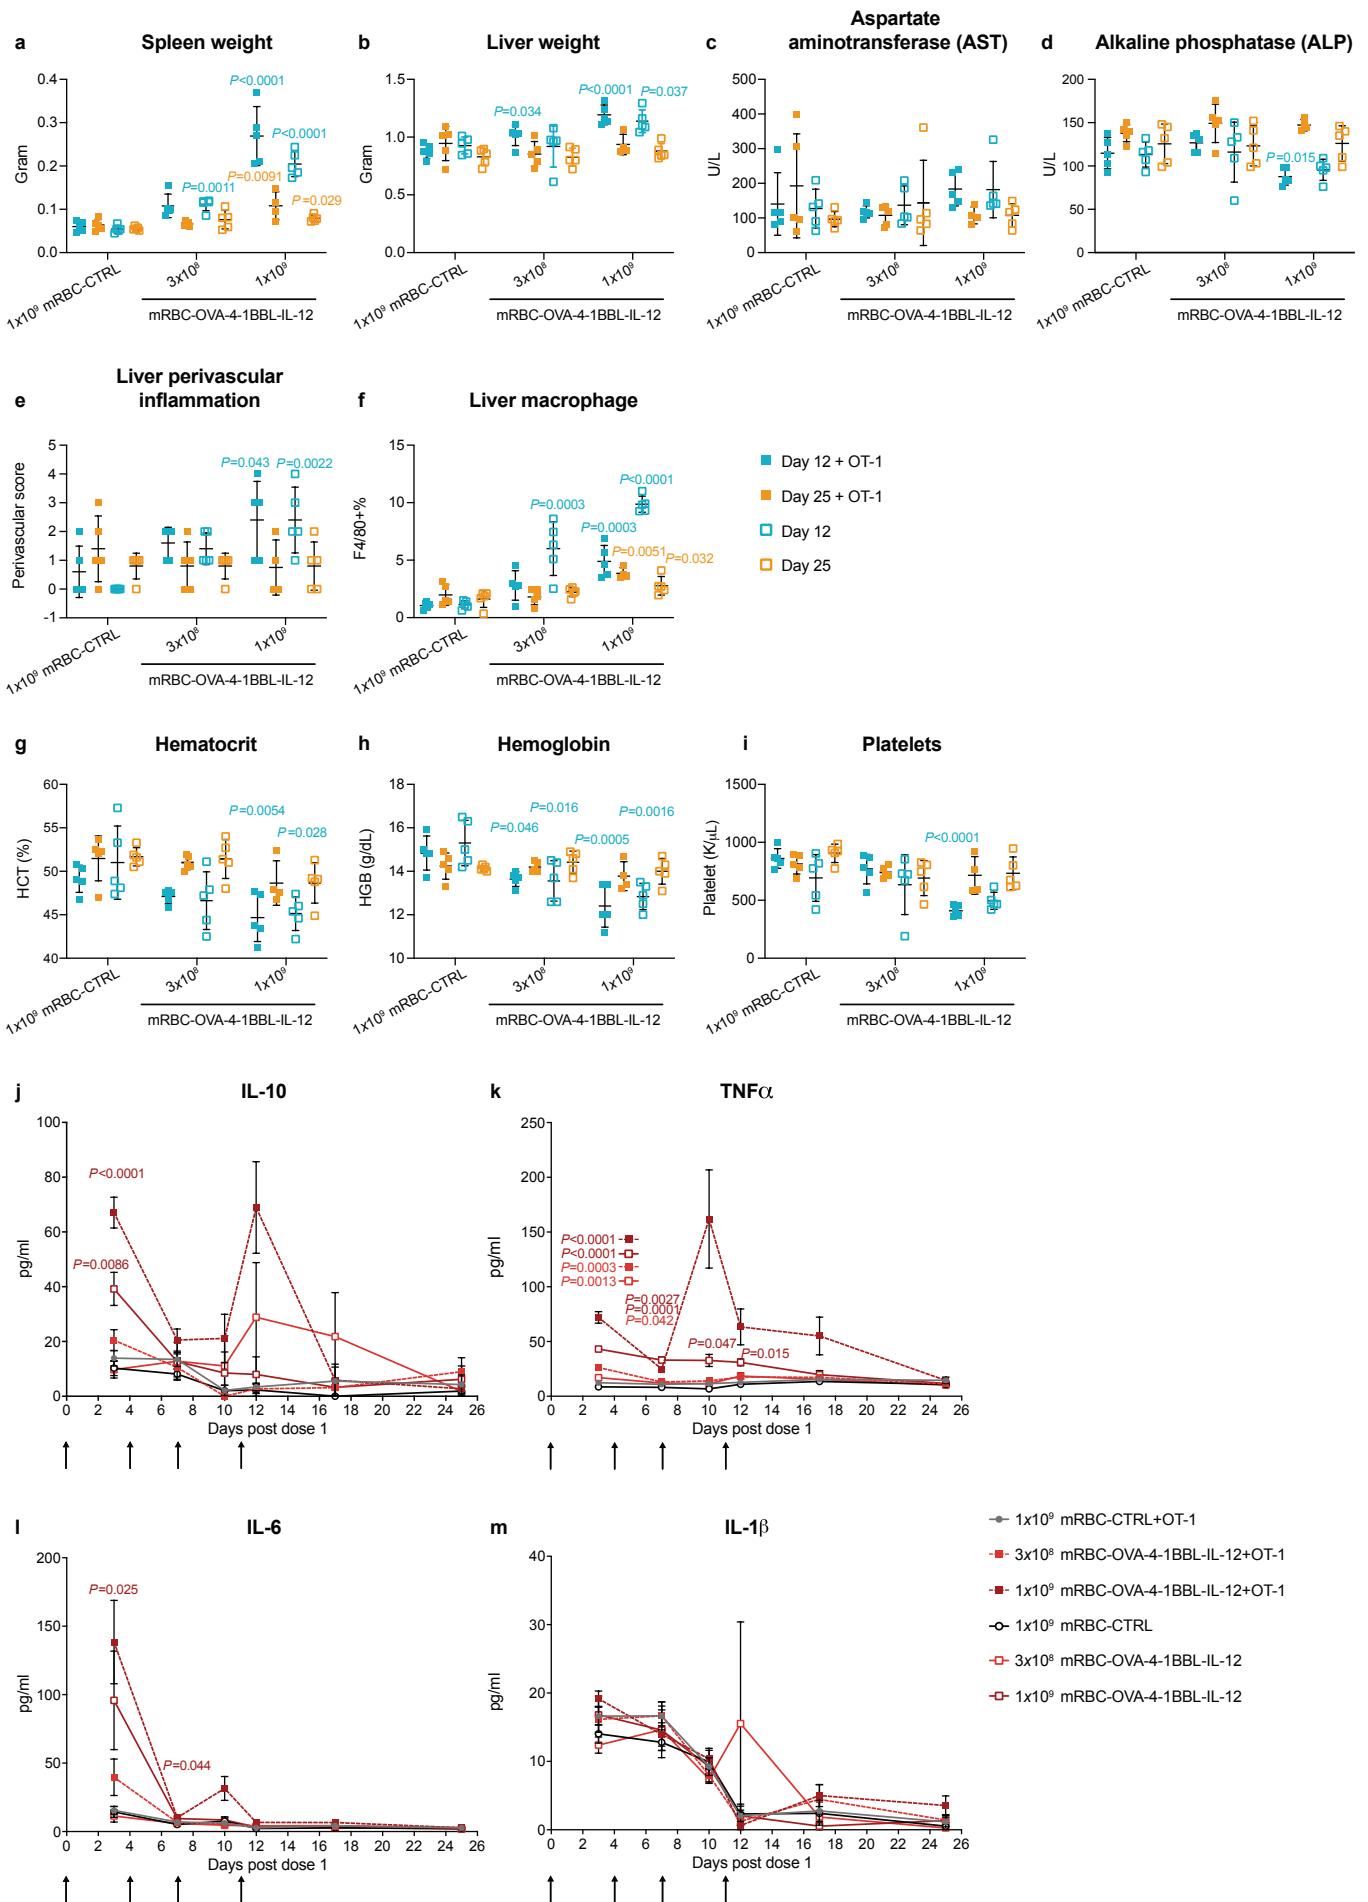

**Supplementary Fig. 5 mRBC-OVA-4-1BBL-IL-12 was well tolerated.** CD45.1 Pep Boy mice (n=10) were treated with  $1 \times 10^6$  naïve OT-1 cells or left untreated, and dosed with either  $1 \times 10^9$  mRBC-CTRL or a dose titration of mRBC-OVA-4-1BBL-IL-12 ( $1 \times 10^9$  or  $3 \times 10^8$ ) on days 0, 4, 7 and 11. n=5 were sacrificed on Day 12 with n=5 measured for time points post day 12 for all groups except for n=4 for mRBC-OVA-4-1BBL-IL-12+OT-1. **a**, Spleen weight; **b**, liver weight; **c**, serum aspartate aminotransferase (AST) levels; **d**, serum alkaline phosphatase (ALP) levels; **e**, liver perivascular inflammation score; **f**, liver macrophage infiltration; **g**, hematocrit levels; **h**, hemoglobin levels; **i**, platelet levels on days 12 and 25 (**a-i**: n=5 for all groups except for n=4 for mRBC-OVA-4-1BBL-IL-12+OT-1 on day 25). **j**, Plasma IL-10 levels; **k**, plasma TNF $\alpha$  levels; **l**, plasma IL-6 levels; **m**, plasma IL-1 $\beta$  levels over time (**j-m**: n=10 for days 3 and 7, n=5 for days 10, 12, 17 and 25 except for n=4 for mRBC-OVA-4-1BBL-IL-12+OT-1 on days 17 and 25). One-way ANOVA (**a**, **b**, **c**, **d**, **f**, **g**, **h**, **i**), one-way ANOVA nonparametric Kruskal-Wallis test with Dunn's multiple comparisons test (**e**), two-way ANOVA (**j**, **k**, **l**, **m**) compared to mRBC-CTRL. Data are depicted as mean  $\pm$  s.d. and are representative of two independent experiments. Source data are provided as a Source Data file.

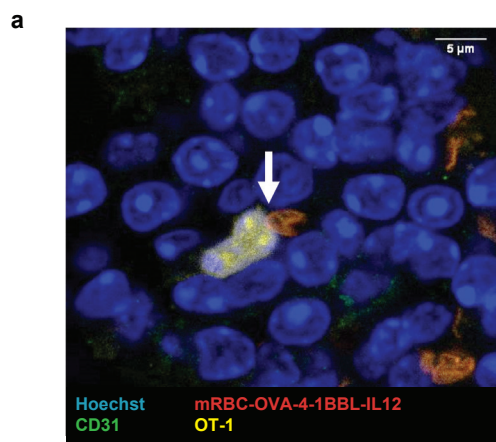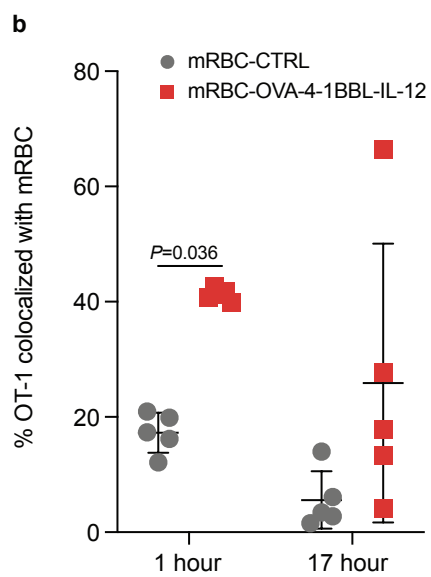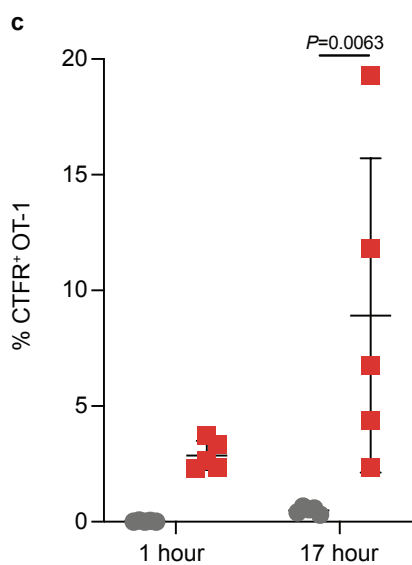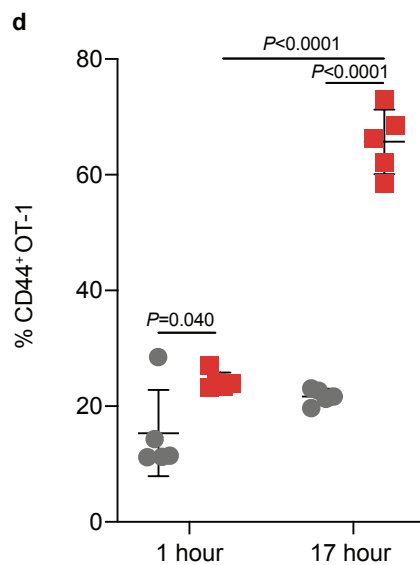

**Supplementary Fig. 6 mRBC-OVA-4-1BBL-IL-12 interacts with OT-1 cells in the spleen.** CD45.1

Pep Boy mice (n=5) were transferred with  $2 \times 10^6$  naïve CellTrace Yellow dye-labeled OT-1 cells before dosing with  $1 \times 10^9$  CellTrace Far Red dye-labeled mRBC-CTRL, or mRBC-OVA-4-1BBL-IL12. One hour or 17 hours post mRBC injection, mice were sacrificed. **a-b**, immunofluorescence analyses of spleen. Representative confocal image of OT-1 and mRBC-OVA-4-1BBL-IL12 interaction 1-hour post dose (**a**) and quantification of % OT-1 co-localized with mRBCs (**b**). One-way ANOVA compared to mRBC-CTRL and time points; 1-hour mRBC-CTRL vs mRBC-OVA-4-1BBL-IL-12  $P = 0.036$ . **c-d**, Flow cytometry analyses of (**c**) CellTrace Far Red (CTFR) dye<sup>+</sup> mRBC signal associated with OT-1 cells (**c**) and % CD44<sup>+</sup> OT-1 cells (**d**). One-way ANOVA compared to mRBC-CTRL and time points; 17 hour % CTFR<sup>+</sup> OT-1: mRBC-CTRL vs mRBC-OVA-4-1BBL-IL-12  $P = 0.0063$ ; 1 hour % CD44<sup>+</sup> OT-1 mRBC-CTRL vs mRBC-OVA-4-1BBL-IL-12  $P = 0.04$ ; 17 hour % CD44<sup>+</sup> OT-1 mRBC-CTRL vs mRBC-OVA-4-1BBL-IL-12  $P < 0.0001$ ; % CD44<sup>+</sup> OT-1 mRBC-OVA-4-1BBL-IL-12 1 hour vs 17 hour  $P < 0.0001$ . Data are depicted as mean  $\pm$  s.d. and are representative of two independent experiments. Source data are provided as a Source Data file.

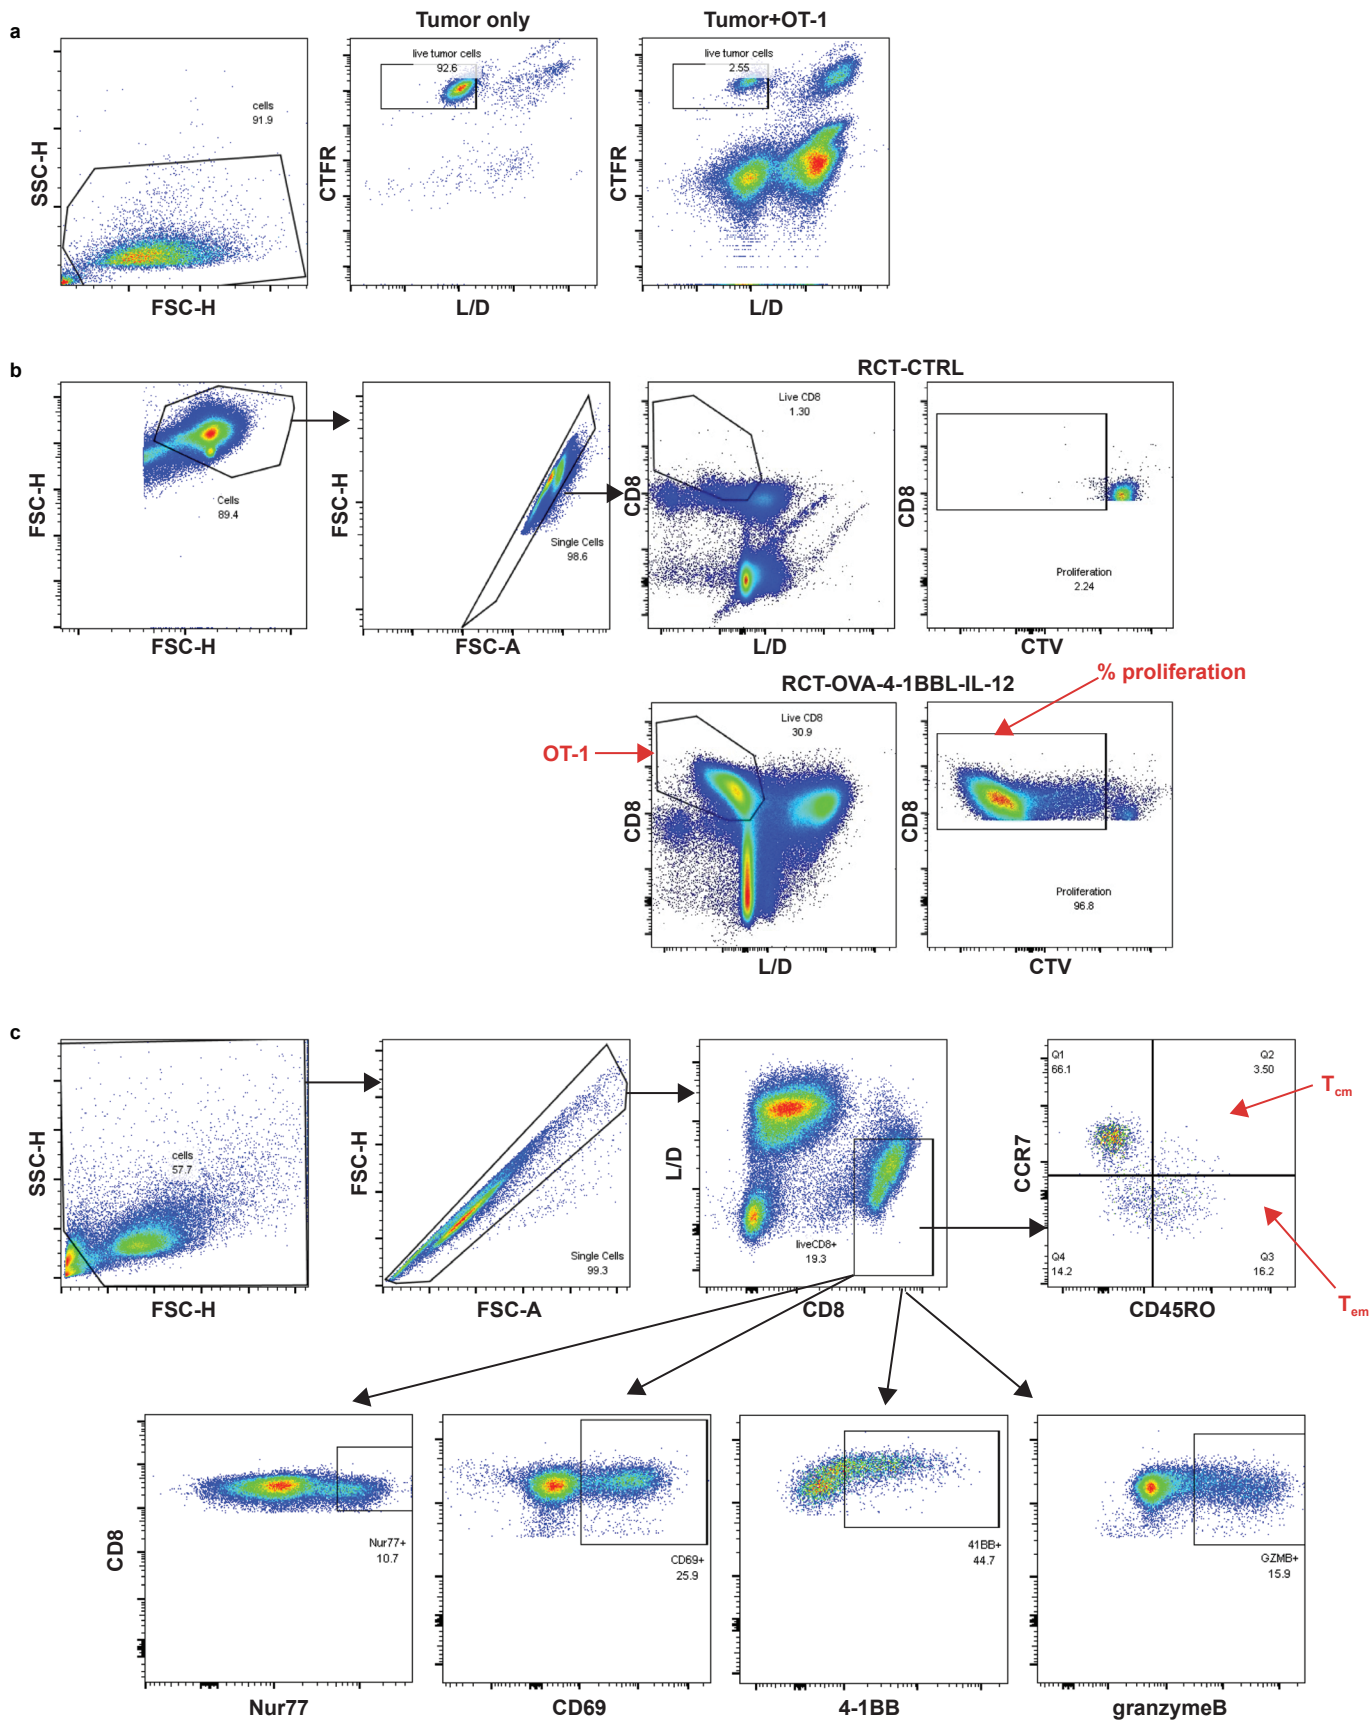

**Supplementary Fig. 7 Flow cytometry gating scheme for in vitro assays.** **a**, Flow cytometry gating scheme for tumor killing assay in Fig. 1a and Supplementary Fig. 2a. **b**, Flow cytometry gating scheme for aAPC and OT-1 or pmel-1 co-culture assays in Supplementary Fig. 1c and 2b. **c**, Flow cytometry gating scheme for assays shown in Fig. 6. L/D, LIVE/DEAD™ stain; CTFR, CellTrace™ Far Red; CTV, CellTrace™ Violet; T<sub>em</sub>, effector memory T cells; T<sub>cm</sub>, central memory T cells.

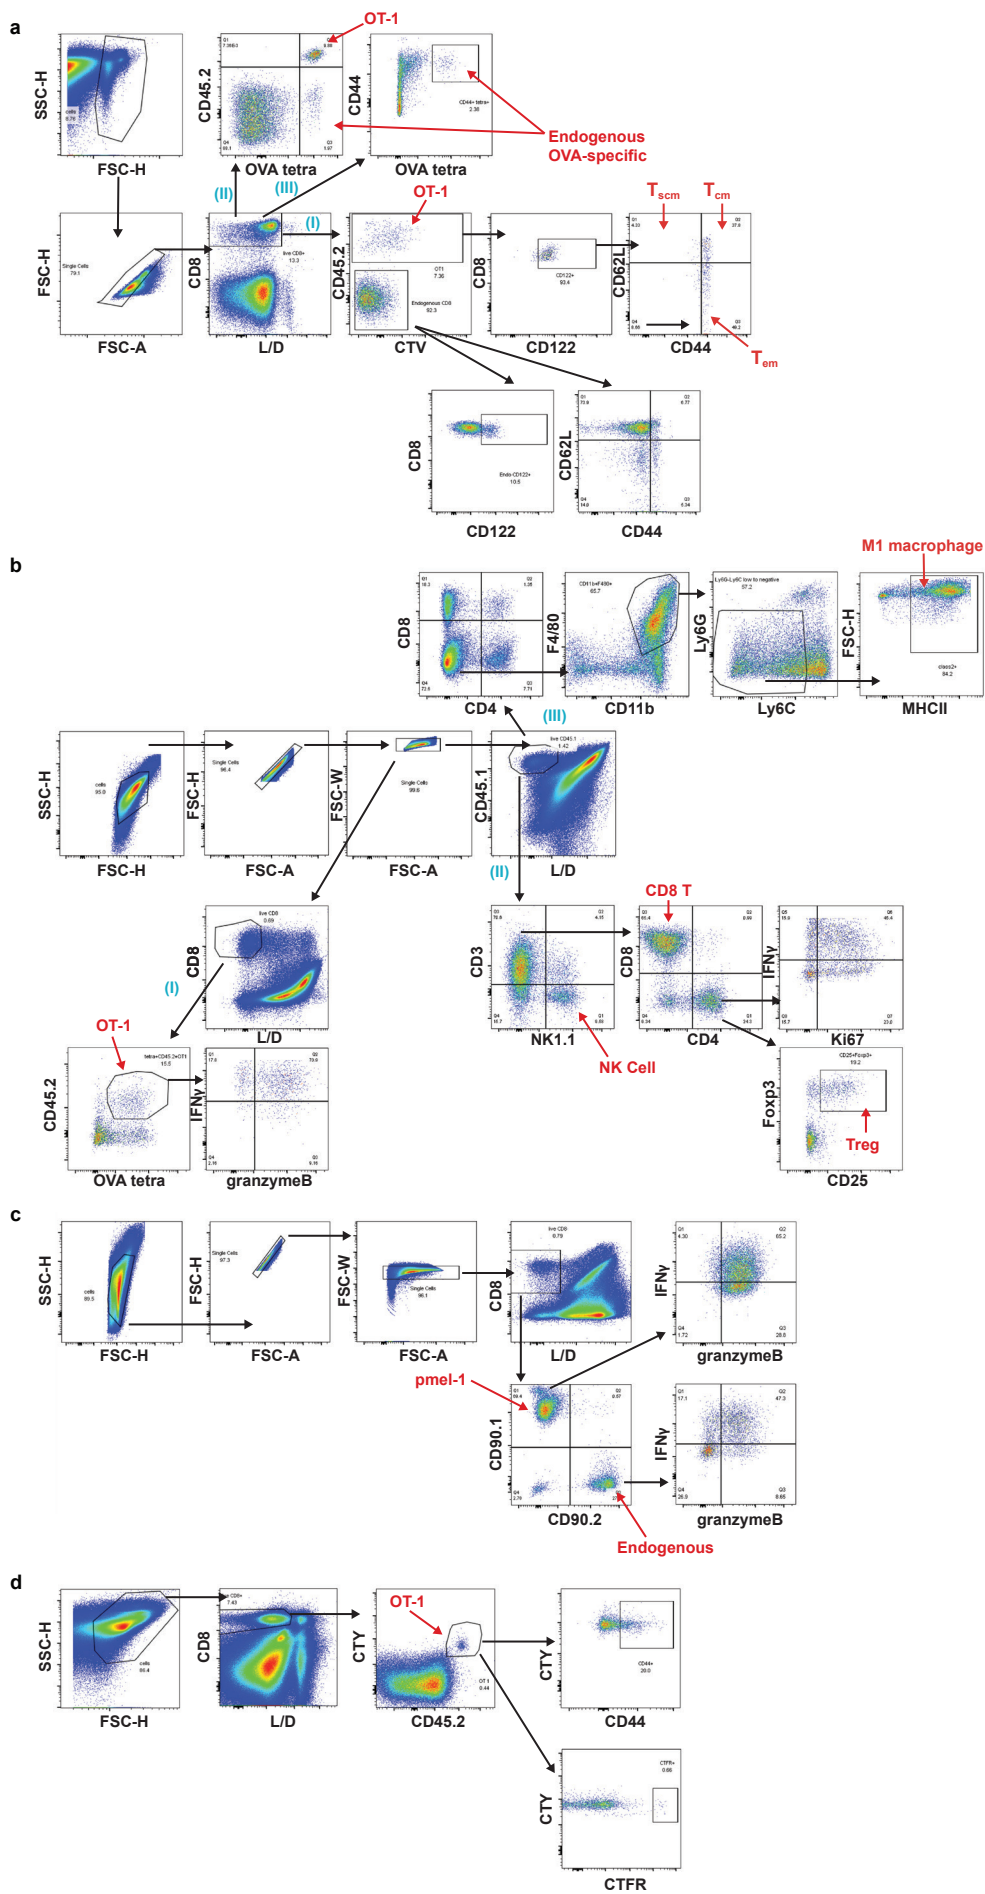

**Supplementary Fig. 8 Flow cytometry gating scheme for in vivo studies.** **a**, Flow cytometry gating scheme for OT-1 T cell analyses in the blood in Fig. 1c, d, j, l (analysis I), Fig. 3d, e (analysis II), and Fig. 4c (analysis III). **b**, Flow cytometry gating scheme for OT-1 T cell analyses in the tumor in Fig. l, n (analysis I), Supplementary Fig. 4a-c (analysis II), and Supplementary Fig. 4d (analysis III). **c**, Flow cytometry gating scheme for pmel-1 T cell analyses in Fig. 5. **d**, Flow cytometry gating scheme for OT-1 T cell analyses in the spleen in Supplementary Fig. 6c, d. L/D, LIVE/DEAD™ stain; CTV, CellTrace™ Violet; CTFR, CellTrace™ Far Red; CTY, CellTrace™ Yellow; T<sub>em</sub>, effector memory T cells; T<sub>cm</sub>, central memory T cells; T<sub>scm</sub>, stem memory T cells.
