# Supplementary material for: Engineered red blood cells as an off-the-shelf allogeneic anti-tumor therapeutic
Source: PubMed Central journal article supplement (PMC8113241; doi:10.1038/s41467-021-22898-3), 2021-05-11
Supplement: 41467_2021_22898_MOESM2_ESM.pdf [file 41467_2021_22898_MOESM2_ESM.pdf]

Descriptions of Additional Supplementary Files

**Supplementary Movie 1**

**Description:** Live cell confocal videos that captured activated OT-1 cells (green) landed onto a layer of immobilized CellTrace Far Red dye labeled mRBC-CTRL cells (red).

**Supplementary Movie 2**

**Description:** Live cell confocal videos that captured activated OT-1 cells (green) landed onto a layer of immobilized mRBC-OVA-4-1BBL-IL-12 that were conjugated with DL650-labeled 4-1BBL protein (red).
